# Supplementary material for: The aluminium and iodine pentoxide reaction for the destruction of spore forming bacteria
Source: Royal Society of Chemistry journal article supplement (doi:10.1039/c0cp00473a), 2010-01-01
Supplement: c0cp00473a.pdf [file c0cp00473a.pdf]

Colony Growth Counts

| Al + I2O5 tests |  |      |      |         |          |
|-----------------|--|------|------|---------|----------|
| Test 2          |  | 24hr | 48hr |         |          |
| Sample 1        |  | 0    | 0    | Average | 0.5      |
| Sample 2        |  | 0    | 0    |         |          |
| Sample 3        |  | 1    | 1    |         |          |
| Sample 4        |  | 0    | 0    |         |          |
| Test 3          |  |      |      |         |          |
| Sample 1        |  | 1    | 1    |         |          |
| Sample 2        |  | 0    | 0    |         |          |
| Sample 3        |  | 1    | 1    |         |          |
| Sample 4        |  | 0    | 0    |         |          |
| Test 4          |  |      |      |         |          |
| Sample 1        |  | 0    | 0    |         |          |
| Sample 2        |  | 0    | 0    |         |          |
| Sample 3        |  | 1    | 1    |         |          |
| Sample 4        |  | 0    | 0    |         |          |
| Test 5          |  |      |      |         |          |
| Sample 1        |  | 2    | 2    |         |          |
| Sample 2        |  | 2    | 2    |         |          |
| Sample 3        |  | 0    | 0    |         |          |
| Sample 4        |  | 0    | 0    |         |          |
| Al + Ag2O       |  |      |      |         |          |
| Test 6          |  |      |      |         |          |
| Sample 1        |  | 60   | 60   | Average | 144.4583 |
| Sample 2        |  | 46   | 46   |         |          |
| Sample 3        |  | 268  | 268  |         |          |
| Sample 4        |  | 264  | 264  |         |          |
| Test 7          |  |      |      |         |          |
| Sample 1        |  | 19   | 19   |         |          |
| Sample 2        |  | 101  | 101  |         |          |
| Sample 3        |  | 108  | 108  |         |          |
| Sample 4        |  | 177  | 177  |         |          |
| Test 8          |  |      |      |         |          |
| Sample 1        |  | 125  | 125  |         |          |
| Sample 2        |  | 183  | 183  |         |          |
| Sample 3        |  | 266  | 266  |         |          |
| Sample 4        |  | 166  | 166  |         |          |
| Test 9          |  |      |      |         |          |
| Sample 1        |  | 111  | 111  |         |          |
| Sample 2        |  | 576  | 576  |         |          |
| Sample 3        |  | 228  | 228  |         |          |
| Sample 4        |  | 149  | 149  |         |          |

|         |
|---------|
| Test 10 |
|---------|

|          |    |    |
|----------|----|----|
| Sample 1 | 33 | 33 |
| Sample 2 | 43 | 43 |
| Sample 3 | 63 | 63 |
| Sample 4 | 32 | 32 |

|         |
|---------|
| Test 11 |
|---------|

|          |     |     |
|----------|-----|-----|
| Sample 1 | 131 | 131 |
| Sample 2 | 199 | 199 |
| Sample 3 | 37  | 37  |
| Sample 4 | 82  | 82  |

|                                     |
|-------------------------------------|
| Al + Fe <sub>2</sub> O <sub>3</sub> |
|-------------------------------------|

|         |
|---------|
| Test 12 |
|---------|

|          |    |    |         |          |
|----------|----|----|---------|----------|
| Sample 1 | 63 | 63 | Average | 167.7917 |
| Sample 2 | 94 | 94 |         |          |
| Sample 3 | 84 | 84 |         |          |
| Sample 4 | 97 | 97 |         |          |

|         |
|---------|
| Test 13 |
|---------|

|          |    |    |
|----------|----|----|
| Sample 1 | 75 | 75 |
| Sample 2 | 50 | 50 |
| Sample 3 | 24 | 24 |
| Sample 4 | 42 | 42 |

|         |
|---------|
| Test 14 |
|---------|

|          |     |     |
|----------|-----|-----|
| Sample 1 | 68  | 68  |
| Sample 2 | 66  | 66  |
| Sample 3 | 111 | 111 |
| Sample 4 | 62  | 62  |

|         |
|---------|
| Test 15 |
|---------|

|          |     |     |
|----------|-----|-----|
| Sample 1 | 71  | 71  |
| Sample 2 | 126 | 126 |
| Sample 3 | 64  | 64  |
| Sample 4 | 44  | 44  |

|         |
|---------|
| Test 16 |
|---------|

|          |     |     |
|----------|-----|-----|
| Sample 1 | 429 | 429 |
| Sample 2 | 353 | 353 |
| Sample 3 | 374 | 374 |
| Sample 4 | 531 | 531 |

|         |
|---------|
| Test 17 |
|---------|

|          |     |     |
|----------|-----|-----|
| Sample 1 | 398 | 398 |
| Sample 2 | 501 | 501 |
| Sample 3 | 143 | 143 |
| Sample 4 | 157 | 157 |
